# Supplementary material
Source: PubMed Central journal article supplement (PMC4470479)
Supplement: NIHMS686384-supplement-Suppl__Tables___Figures.pdf [file NIHMS686384-supplement-Suppl__Tables___Figures.pdf]

## Supplementary Materials for

### A large-scale screen reveals genes that mediate electrotaxis in *Dictyostelium discoideum*

Runchi Gao, Siwei Zhao, Xupin Jiang, Yaohui Sun, Sanjun Zhao, Jing Gao, Jane Borleis, Stacey Willard, Ming Tang, Huaqing Cai, Yoichiro Kamimura, Yuesheng Huang, Jianxin Jiang, Zunxi Huang, Alex Mogilner, Tingrui Pan, Peter N. Devreotes, Min Zhao\*

\*Corresponding author. E-mail: minzhao@ucdavis.edu

Published 26 May 2015, *Sci. Signal.* **8**, ra50 (2015)

DOI: 10.1126/scisignal.aab0562

#### This PDF file includes:

Fig. S1. The collection of mutant strains with morphological defects used in our screen.

Fig. S2. High-throughput screening strategy to determine electrotaxis phenotypes.

Fig. S3. Design and fabrication of the barcoded microplates.

Fig. S4. Cells on barcoded microplates at different positions in an electrotaxis chamber showed consistent electrotaxis responses.

Fig. S5. *Dictyostelium* cells displayed consistent migration phenotypes on both barcoded microplates and tissue culture dishes.

Fig. S6. Recapitulation of the defective electrotaxis phenotype in the mutant strains by knockout cells.

Fig. S7. Electrotaxis of vegetative cells.

Fig. S8. Mutated strains of *Dictyostelium* cells displayed consistent migration phenotypes on barcoded microplates and tissue culture dishes.

Table S1. Defective strains identified from the screen.

Table S2. Hyperresponsive strains identified.

Table S3. Knockouts confirmed the genes that underlie the 12 defective strains.

Legends for movies S1 to S4

#### Other Supplementary Material for this manuscript includes the following:

(available at [www.sciencesignaling.org/cgi/content/full/8/378/ra50/DC1](http://www.sciencesignaling.org/cgi/content/full/8/378/ra50/DC1))

Movie S1 (.avi format). Wild-type AX2 cell not in an electric field.

Movie S2 (.avi format). Wild-type AX2 cell in an electric field of 12 V/cm.

Movie S3 (.avi format). *PiaA*<sup>-</sup> in an electric field of 12 V/cm.

Movie S4 (.avi format). Reexpression of *piaA* in *piaA*<sup>-</sup> cells restored electrotaxis.

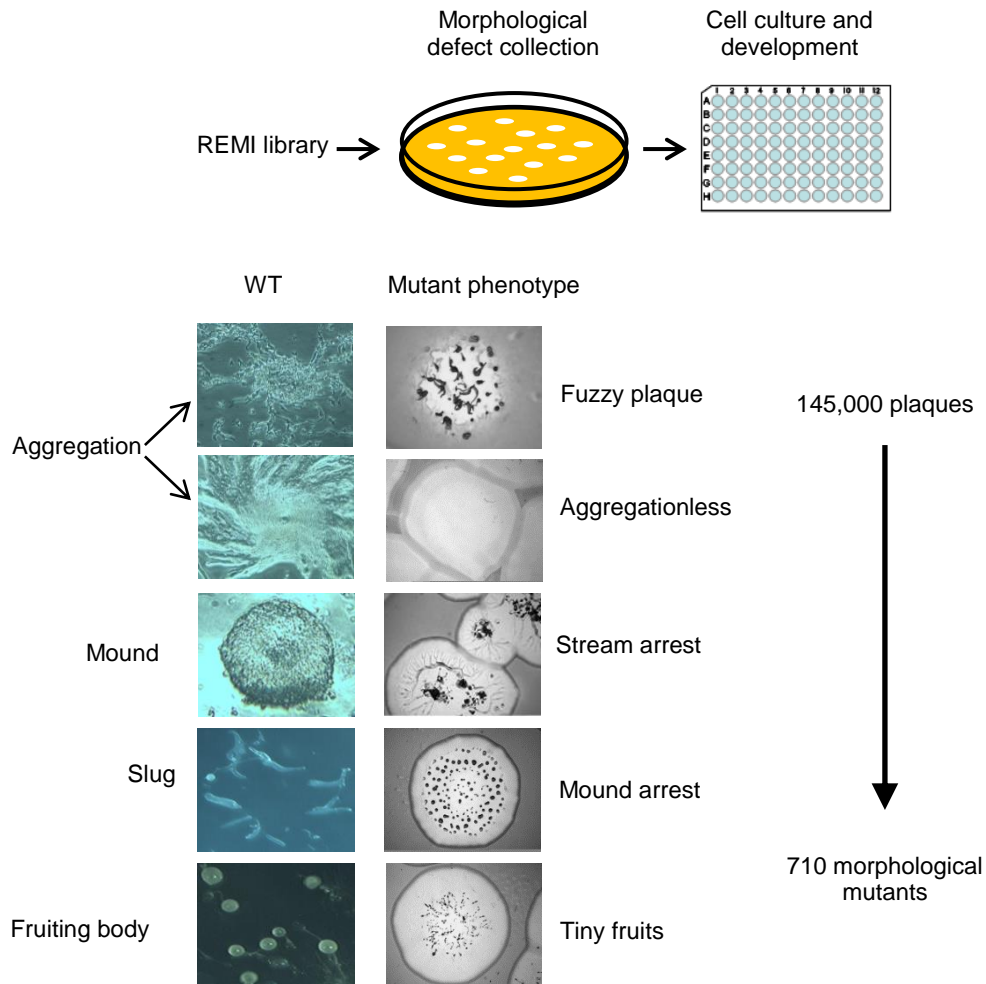

**Fig. S1. The collection of mutant strains with morphological defects used in our screen.**

A set of mutants with morphological defects were selected from a REMI library. Individual cells plated on bacterial lawns grew within a few days to form ~1cm plaques. The genetically identical cells within the plaque aggregated and differentiated to form multicellular structures. If the original cells bore a genetic defect that acted early in the developmental program, the plaque formed, but the cells remained as a monolayer. When cells developed further to form mounds or slugs, the size of mounds and slugs and the number of culminating heads provided a second set of criteria for defining the morphological phenotype. The size and number of fruiting bodies was the third criterion. About 710 morphological defect mutants were collected from 145,000 mutants. These were: aggregationless (202 mutants), tiny fruits (167 mutants), culmination defect (135 mutants), mound arrest (87 mutants), stalk/spore defect (79 mutants), stream arrest (32 mutants), and fuzzy plaque (8 mutants).

**A. Different strains on different microplates**

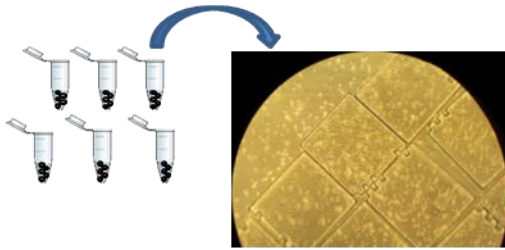

**C. Cell migration on a microplate**

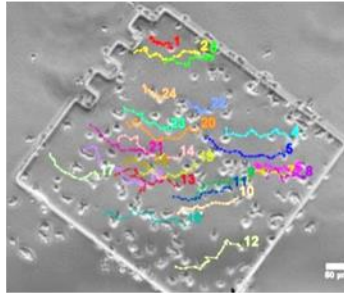

**B. Imaging of cells on microplates**

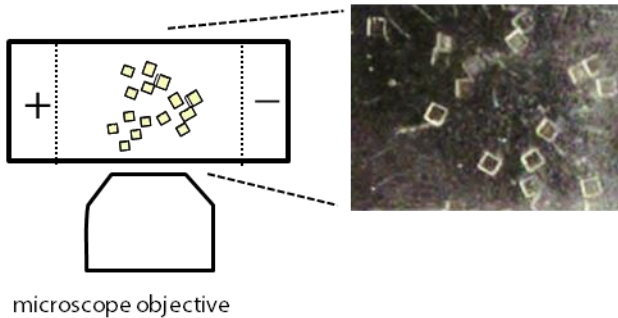

**D. Molecular cloning**

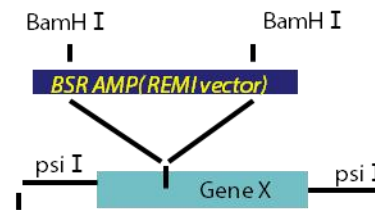

**Fig. S2. High-throughput screening strategy to determine electrotaxis phenotypes.**

- A.** Seeding cells from individual strains on bar-coded microplates of polyethylene glycol (PEG) hydrogel.
- B.** Multiple bar-coded microplates were loaded into an electrotaxis chamber, which was placed on a microscope stage for multi-field time-lapse digital imaging, thereby allowing simultaneous screening for electrotaxis phenotype of many strains at the same time. The photograph on the right shows a microscopic field with multiple microplates.
- C.** A typical micrograph of a bar-coded microplate with cells, and migration trajectories (colored lines) of cells tracked with ImageJ superimposed on the microplate.
- D.** Molecular cloning of the site of insertion and the flanking DNA.

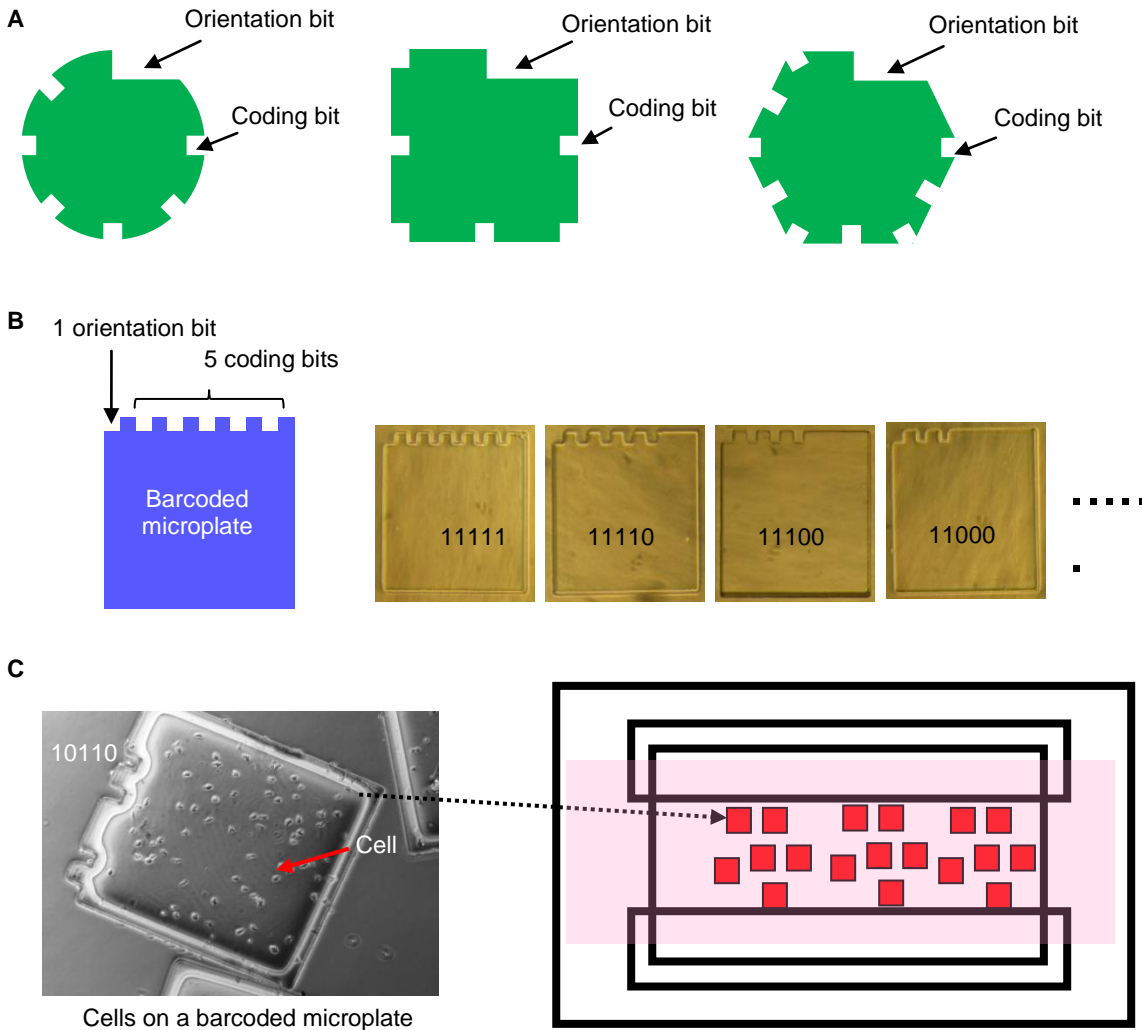

**Fig. S3. Design and fabrication of the barcoded microplates.**

**A.** A large number of coded microplates could be made in circular, hexagonal, or square shapes. Each microplate included one orientation bit indicating the start position and reading direction of the barcode. Coding bits identified individual barcoded microplates, which contained specific cell strains. The size of the plates used in this study were in the 100mmx100 mm to 500mmx500mm range.

**B.** A square microplate design was employed for large migration area and easy barcode placement. A five-digit binary barcode was designed to encode hundreds of strains of mutated *Dictyostelium* cells.

**C.** A microplate loaded with cells (left). Many plates with different strains could be loaded into an electroaxis chamber for high throughput electroaxis experiments.

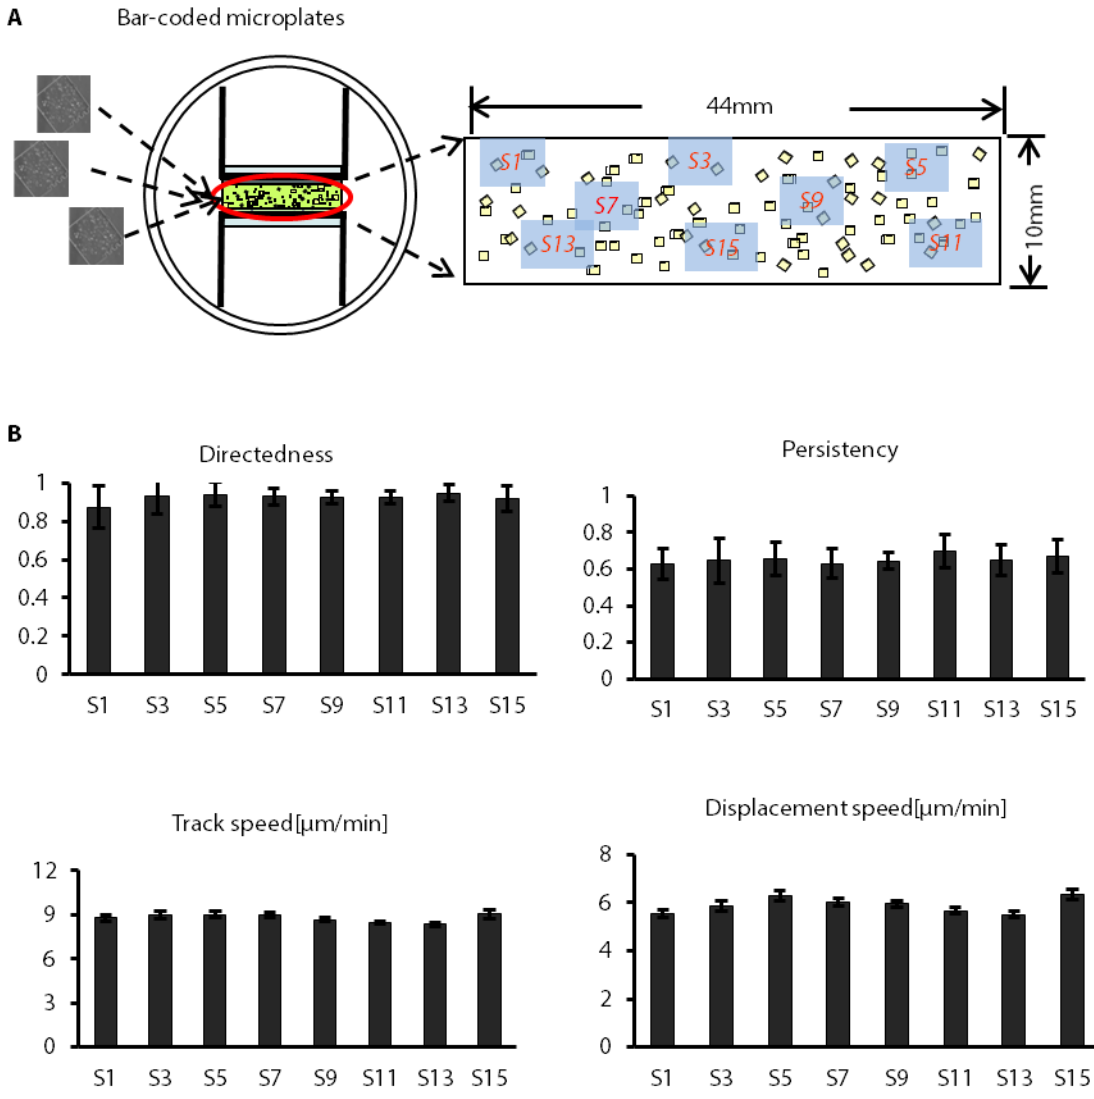

**Fig. S4. Cells on barcoded microplates at different positions in an electrotaxis chamber showed consistent electrotaxis responses.**

**A.** A schematic diagram shows selected positions in an electrotaxis chamber where cell migration was recorded and analyzed.

**B.** Quantitative analyses of cell migration at eight different positions in an electrotaxis chamber showed consistent electrotaxis responses. Directedness, persistence, track speed and displacement speed were similar at all positions.  $EF= 12\text{V}/\text{cm}$ . Data (mean  $\pm$ SEM) for each position were quantified from 50 cells per condition in three independent experiments.

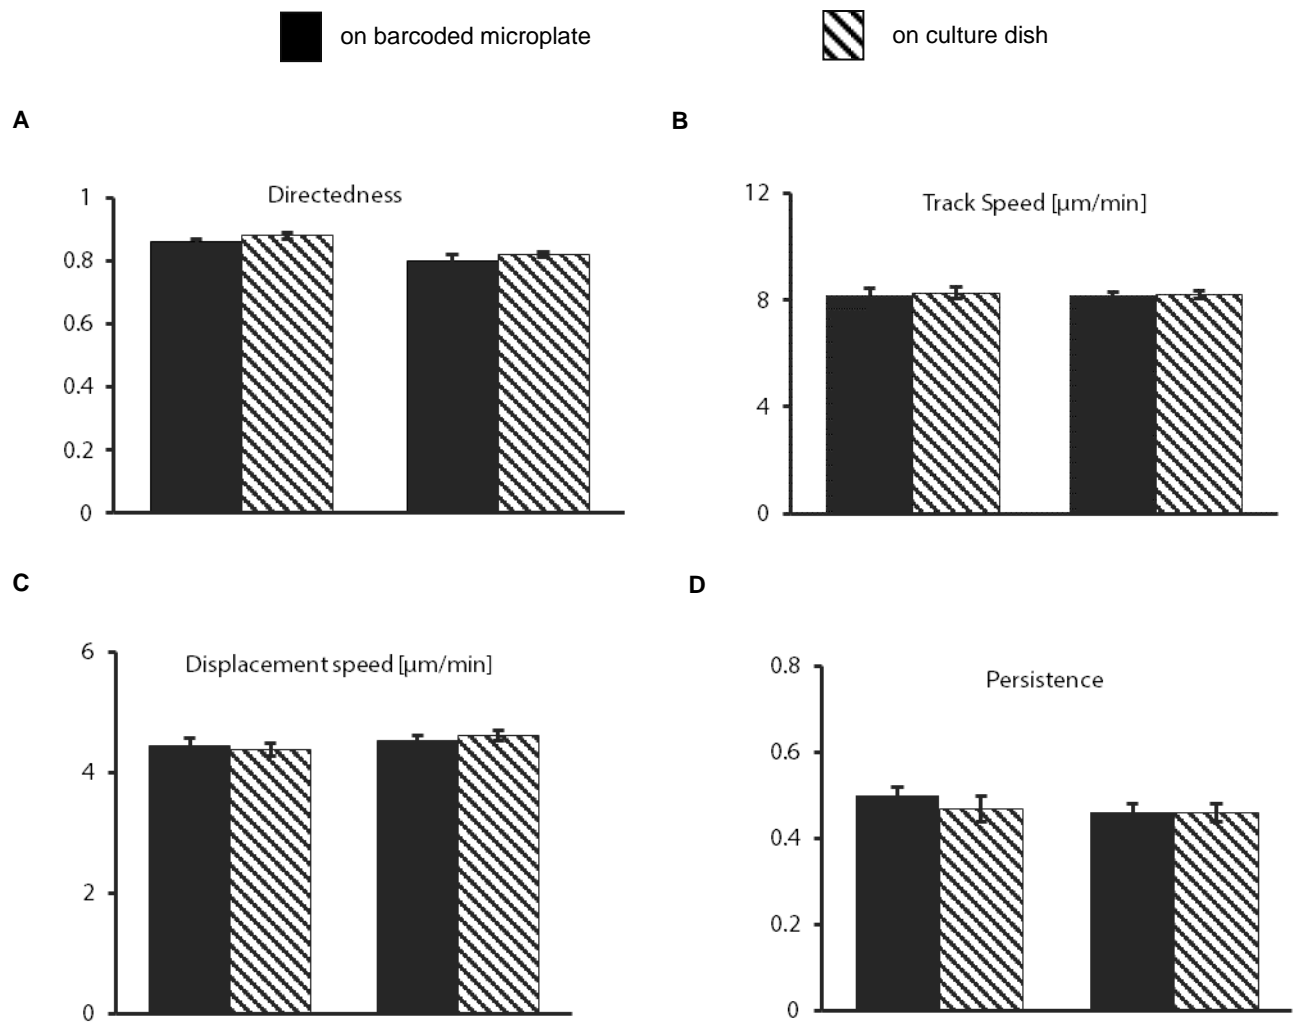

**Fig. S5. *Dictyostelium* cells displayed consistent migration phenotypes on both barcoded microplates and on tissue culture dishes.**

AX2 and AX3 cells displayed the same electrotaxis response on barcoded microplate material and culture dish plates. n=40-50 cells per condition from at least three independent experiment.

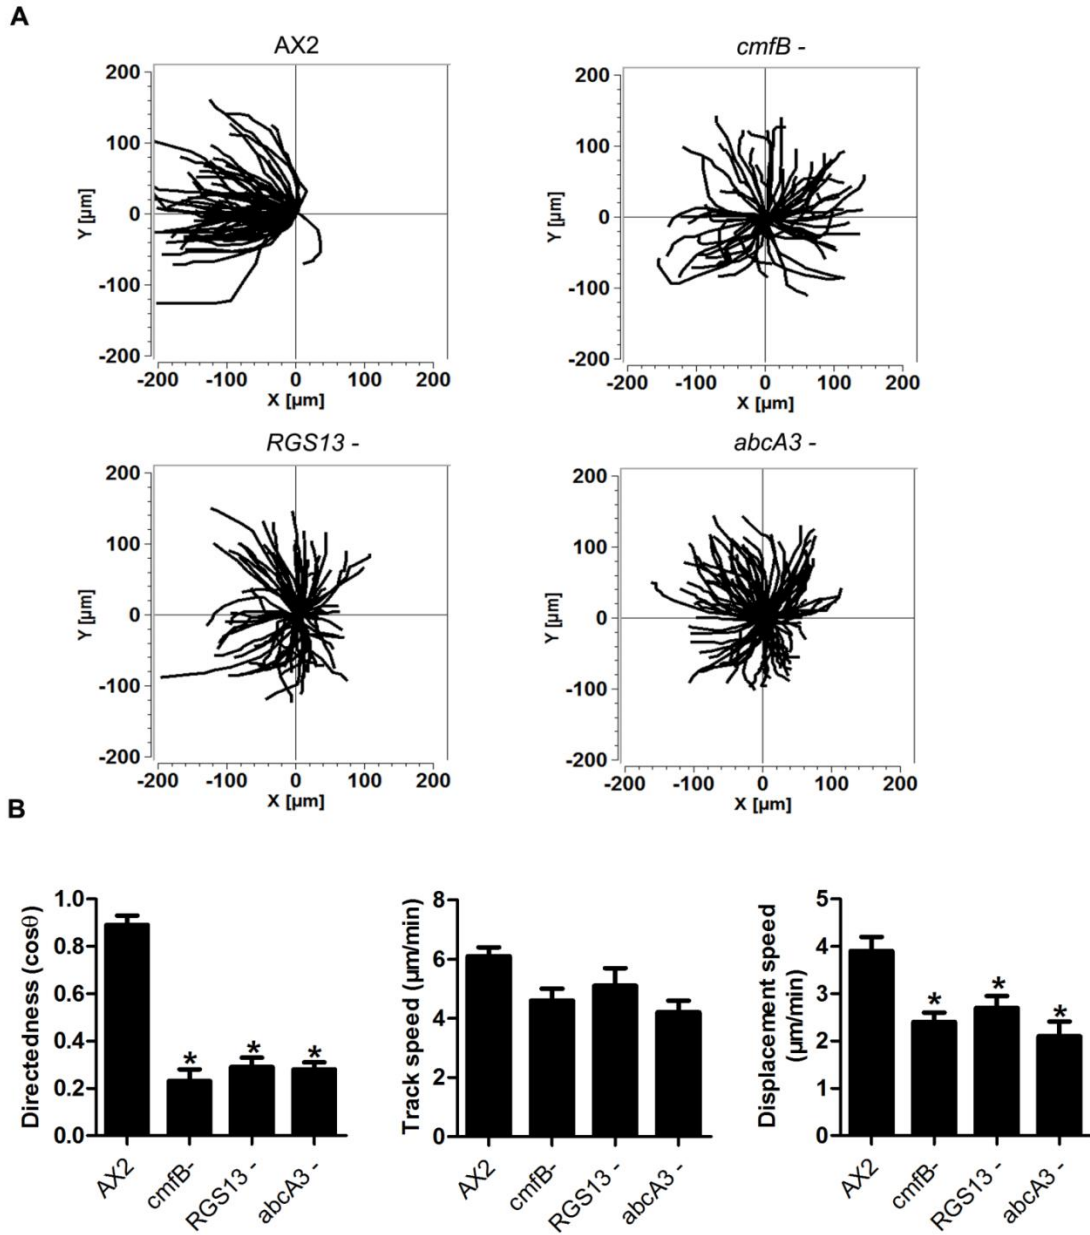

**Fig. S6. Recapitulation of the defective electroxis phenotype in the mutant strains by knockout cells.**

**A.** Electrotaxis of knock-out strains (*cmfB*<sup>-</sup>, *RGS13*<sup>-</sup> and *abcA3*<sup>-</sup>). Cell migration trajectories are presented with the start point of each cell set as the origin. WT cell (AX2) migrated directionally towards the cathode (to the left). Electrotaxis was significantly impaired in *cmfB*<sup>-</sup>, *RGS13*<sup>-</sup> or *abcA3*<sup>-</sup> cells.

**B.** *cmfB*<sup>-</sup>, *RGS13*<sup>-</sup> or *abcA3*<sup>-</sup> cells showed significantly decreased directedness values, without significant effects on the trajectory speed.

Data are mean $\pm$ s.e.m. from at least 50 cells per genotype from three independent experiments. \*\*P < 0.01, Student's t-test, compared with AX2 WT cells.

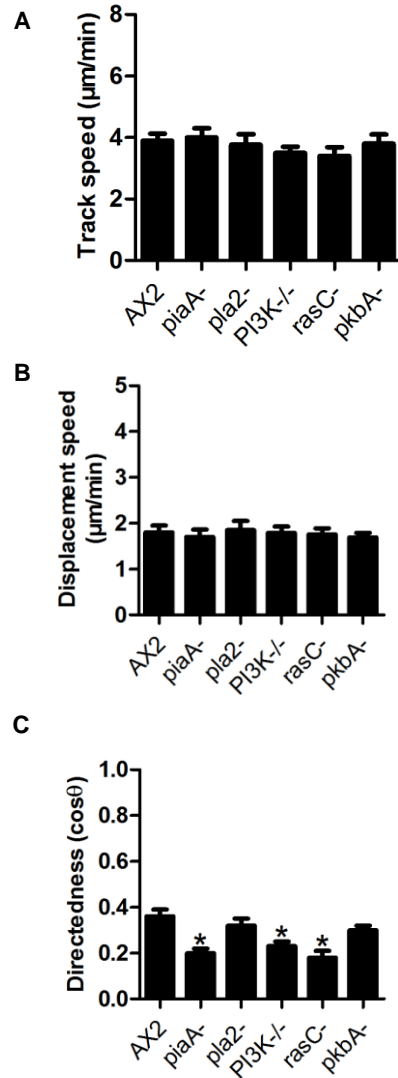

**Fig. S7. Electrotaxis of vegetative cells.**

**A, B.** Vegetative cells of different knockout strains had the similar migration speeds in an electric field.

**C.** Different mutated cells (*piaA*<sup>-</sup>, *PI3K*<sup>-/-</sup> and *rasC*<sup>-</sup>) showed significantly decreased electrotaxis.

Data are mean  $\pm$  s.e.m. from at least 50 cells per genotype from three independent experiments. \*:  $p < 0.05$  when compared with wild-type (Ax2) cells in an electric field of the same strength.



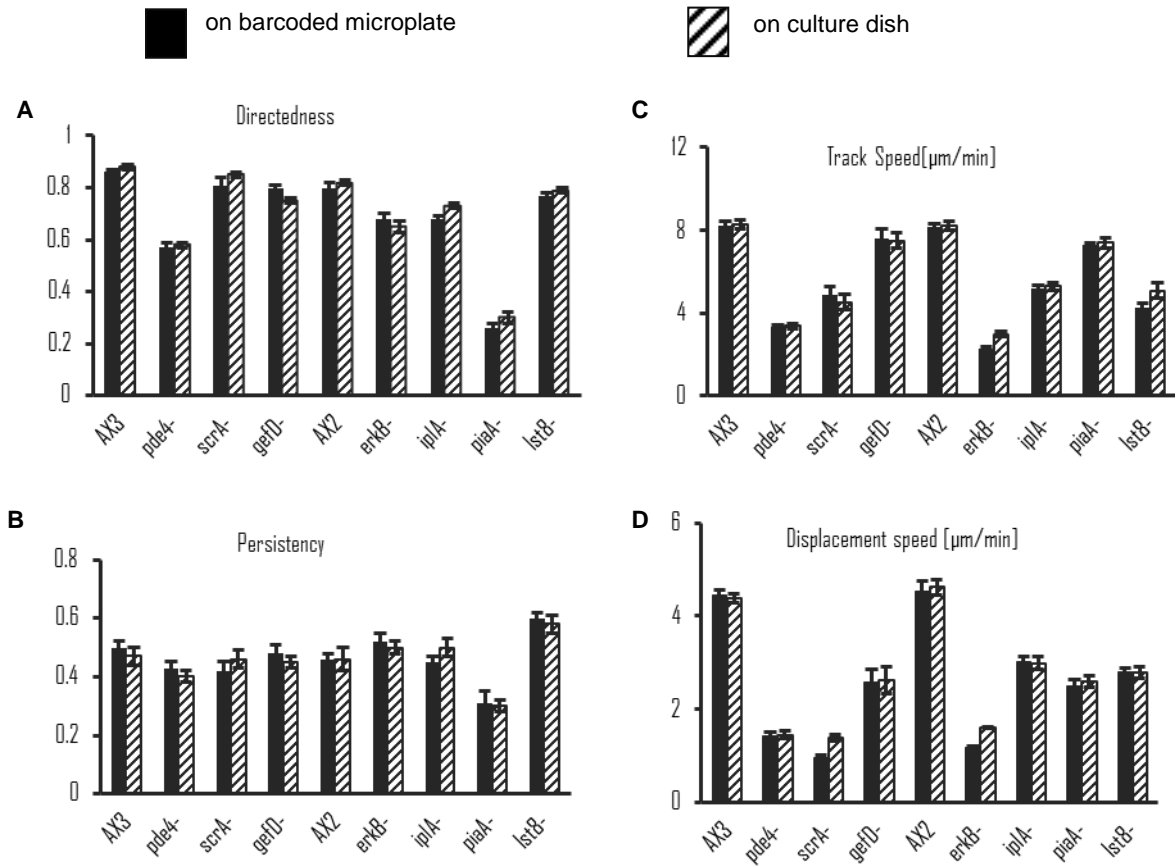

**Fig. S8. Mutated strains of *Dictyostelium* cells displayed consistent migration phenotypes on barcoded microplates and tissue culture dishes.**

AX2, AX3 and selective mutants strains displayed the same electrotactic response on barcoded microplates and culture dishes. n=40-50 cells per genotype from at least three independent experiment.

**Table S1. Defective strains identified from the screen.**

| <b>Strain</b> | <b>directedness</b> | <b>persistency</b> | <b>track speed (<math>\mu\text{m}/\text{min}</math>)</b> | <b>displacement speed (<math>\mu\text{m}/\text{min}</math>)</b> |
|---------------|---------------------|--------------------|----------------------------------------------------------|-----------------------------------------------------------------|
| WT            | (-)0.90 $\pm$ 0.03  | 0.57 $\pm$ 0.02    | 6.08 $\pm$ 0.21                                          | 3.48 $\pm$ 0.16                                                 |
| SN-129        | (-)0.08 $\pm$ 0.02  | 0.31 $\pm$ 0.01    | 4.63 $\pm$ 0.32                                          | 1.44 $\pm$ 0.12                                                 |
| SN-576        | (-)0.16 $\pm$ 0.02  | 0.34 $\pm$ 0.03    | 2.50 $\pm$ 0.14                                          | 1.24 $\pm$ 0.18                                                 |
| SN-183        | (-)0.17 $\pm$ 0.02  | 0.32 $\pm$ 0.02    | 7.63 $\pm$ 0.40                                          | 3.24 $\pm$ 0.31                                                 |
| SN-494        | (-)0.19 $\pm$ 0.11  | 0.41 $\pm$ 0.03    | 7.68 $\pm$ 0.41                                          | 3.28 $\pm$ 0.34                                                 |
| SN-517        | (-)0.20 $\pm$ 0.10  | 0.26 $\pm$ 0.12    | 5.17 $\pm$ 0.29                                          | 1.42 $\pm$ 0.13                                                 |
| SN-028        | (-)0.21 $\pm$ 0.09  | 0.26 $\pm$ 0.02    | 6.00 $\pm$ 0.27                                          | 1.57 $\pm$ 0.14                                                 |
| SN-447        | (-)0.21 $\pm$ 0.10  | 0.30 $\pm$ 0.02    | 3.48 $\pm$ 0.15                                          | 1.05 $\pm$ 0.11                                                 |
| SN-613        | (-)0.22 $\pm$ 0.12  | 0.33 $\pm$ 0.03    | 6.54 $\pm$ 0.35                                          | 2.25 $\pm$ 0.30                                                 |
| SN-677        | (-)0.22 $\pm$ 0.10  | 0.31 $\pm$ 0.02    | 5.27 $\pm$ 0.23                                          | 1.65 $\pm$ 0.15                                                 |
| SN-123        | (-)0.22 $\pm$ 0.10  | 0.30 $\pm$ 0.02    | 2.66 $\pm$ 0.13                                          | 0.82 $\pm$ 0.10                                                 |
| SN-P27        | (-)0.23 $\pm$ 0.09  | 0.23 $\pm$ 0.03    | 4.73 $\pm$ 0.25                                          | 1.28 $\pm$ 0.13                                                 |
| SN-139        | (-)0.24 $\pm$ 0.11  | 0.28 $\pm$ 0.04    | 3.62 $\pm$ 0.21                                          | 1.08 $\pm$ 0.13                                                 |
| SN-150        | (-)0.24 $\pm$ 0.10  | 0.27 $\pm$ 0.02    | 4.70 $\pm$ 0.19                                          | 1.28 $\pm$ 0.10                                                 |
| SN-333        | (-)0.25 $\pm$ 0.02  | 0.32 $\pm$ 0.01    | 4.79 $\pm$ 0.33                                          | 1.51 $\pm$ 0.22                                                 |
| SN-598        | (-)0.20 $\pm$ 0.10  | 0.30 $\pm$ 0.02    | 6.59 $\pm$ 0.34                                          | 2.21 $\pm$ 0.29                                                 |
| SN-584        | (-)0.20 $\pm$ 0.11  | 0.35 $\pm$ 0.02    | 7.29 $\pm$ 0.40                                          | 2.61 $\pm$ 0.25                                                 |
| SN-106a       | (-)0.21 $\pm$ 0.11  | 0.36 $\pm$ 0.03    | 5.88 $\pm$ 0.30                                          | 2.16 $\pm$ 0.23                                                 |
| SN-040        | (-)0.21 $\pm$ 0.11  | 0.33 $\pm$ 0.02    | 5.49 $\pm$ 0.24                                          | 1.88 $\pm$ 0.19                                                 |
| SN-470        | (-)0.23 $\pm$ 0.12  | 0.29 $\pm$ 0.02    | 4.94 $\pm$ 0.34                                          | 1.49 $\pm$ 0.19                                                 |
| SN-165        | (-)0.24 $\pm$ 0.07  | 0.31 $\pm$ 0.02    | 3.82 $\pm$ 0.19                                          | 1.20 $\pm$ 0.14                                                 |
| SN-661        | (-)0.25 $\pm$ 0.13  | 0.31 $\pm$ 0.03    | 8.66 $\pm$ 0.48                                          | 2.84 $\pm$ 0.35                                                 |
| SN-242        | (-)0.26 $\pm$ 0.11  | 0.37 $\pm$ 0.02    | 4.89 $\pm$ 0.29                                          | 1.74 $\pm$ 0.15                                                 |
| SN-252        | (-)0.27 $\pm$ 0.10  | 0.26 $\pm$ 0.02    | 8.93 $\pm$ 0.43                                          | 2.40 $\pm$ 0.33                                                 |
| SN-223        | (-)0.28 $\pm$ 0.12  | 0.35 $\pm$ 0.03    | 10.30 $\pm$ 0.81                                         | 4.03 $\pm$ 0.53                                                 |
| SN-290        | (-)0.28 $\pm$ 0.10  | 0.41 $\pm$ 0.02    | 7.21 $\pm$ 0.44                                          | 2.94 $\pm$ 0.26                                                 |
| SN-432        | (-)0.29 $\pm$ 0.10  | 0.34 $\pm$ 0.03    | 7.76 $\pm$ 0.42                                          | 2.88 $\pm$ 0.38                                                 |
| SN-403        | (-)0.29 $\pm$ 0.11  | 0.39 $\pm$ 0.03    | 7.51 $\pm$ 0.49                                          | 3.15 $\pm$ 0.43                                                 |

SN-170 (-)0.29±0.12 0.29±0.03 7.01±0.34 3.05±0.24

---

**Table S2. Hyperresponsive strains identified.**

| <b>Strain</b> | <b>directedness</b> | <b>persistency</b> | <b>track speed (μm/min)</b> | <b>displacement speed (μm/min)</b> |
|---------------|---------------------|--------------------|-----------------------------|------------------------------------|
| WT            | (-)0.90±0.03        | 0.57±0.02          | 6.08±0.21                   | 3.48±0.16                          |
| SN-657        | (-)0.91±0.02        | 0.52±0.03          | 7.05±0.42                   | 3.79±0.37                          |
| SN-269        | (-)0.91±0.03        | 0.59±0.03          | 7.09±0.57                   | 4.24±0.38                          |
| SN-703        | (-)0.91±0.02        | 0.64±0.02          | 7.76±0.26                   | 4.99±0.25                          |
| SN-201        | (-)0.92±0.01        | 0.54±0.01          | 5.94±0.33                   | 3.33±0.23                          |
| SN-016        | (-)0.92±0.02        | 0.48±0.02          | 4.02±0.17                   | 2.01±0.15                          |
| SN-141        | (-)0.92±0.02        | 0.54±0.02          | 4.41±0.18                   | 2.42±0.15                          |
| SN-272        | (-)0.93±0.01        | 0.51±0.01          | 4.77±0.23                   | 2.53±0.13                          |
| SN-052        | (-)0.94±0.01        | 0.59±0.01          | 3.57±0.22                   | 2.23±0.12                          |
| SN-658        | (-)0.95±0.01        | 0.58±0.01          | 4.57±0.31                   | 2.67±0.11                          |
| SN-653        | (-)0.95±0.05        | 0.47±0.03          | 5.68±0.22                   | 2.77±0.21                          |
| SN-301        | (-)0.97±0.01        | 0.67±0.01          | 7.73±0.43                   | 5.28±0.31                          |

---

**Table S3. Knockouts confirmed the genes that underlie the 12 defective strains.**

| <b>Abbreviation</b> | <b>Strains names</b>                          | <b>Origins</b> | <b>Source</b> |
|---------------------|-----------------------------------------------|----------------|---------------|
| <i>gefA</i> -       | <i>gefA</i> knockout                          | AX3            | DictyBase     |
| <i>rasC</i> -       | <i>rasC</i> knockout                          | AX2            | Devreotes Lab |
| <i>piaA</i> -       | <i>piaA</i> knockout                          | AX3            | Devreotes Lab |
| <i>rip3</i> -       | <i>rip3</i> knockout                          | AX3            | Devreotes Lab |
| <i>lst8</i> -       | <i>lst8</i> knockout                          | AX2            | Devreotes Lab |
| <i>pkbA</i> -       | <i>pkbA</i> knockout                          | AX2            | Devreotes Lab |
| <i>pkbR1</i> -      | <i>pkbR1</i> knockout                         | AX2            | Devreotes Lab |
| <i>pla2</i> -       | <i>pla2</i> knockout                          | AX2            | Devreotes Lab |
| <i>piaA/pla2</i> -  | <i>piaA</i> and <i>pla2</i> knockout          | AX2            | Devreotes Lab |
| <i>cmfB</i> -       | <i>cmfB</i> knockout                          | AX2            | Devreotes Lab |
| <i>rgs13</i> -      | <i>RGS13</i> knockout                         | AX2            | Devreotes Lab |
| <i>abcA3</i> -      | <i>abcA3</i> knockout                         | AX2            | Devreotes Lab |
| <i>pi3k</i> -/-     | <i>Pi3k1</i> and <i>pi3k2</i> double knockout | AX2            | Devreotes Lab |

Movie S1. Wild-type AX2 cell not in an electric field. The video was recorded every one minute for 30 minutes.

Movie S2. Wild-type AX2 cell in an electric field of 12 V/cm. The video was recorded every one minute for 30 minutes. The negative pole is on the left and the positive pole is on the right.

Movie S3. *PiaA*<sup>-</sup> cell in an electric field of 12 V/cm. The video was recorded every one minute for 30 minutes. The negative pole is on the left and the positive pole is on the right.

Movie S4. Reexpression of *piaA* in *piaA*<sup>-</sup> cells restored electrotaxis. The electrotaxis assays were conducted in an electric field of 12V/cm. The video was recorded every one minute for 30 minutes. The negative pole is on the left and the positive pole is on the right.
